# Supplementary material
Source: PubMed Central journal article supplement (PMC5400098)
Supplement: NIHMS854846-supplement-Supplementary_Tables.pdf [file NIHMS854846-supplement-Supplementary_Tables.pdf]

**Supplementary Table 2. Searching candidate causal SNPs tagged by rs73366469 in the 1000 Genomes Project**

| 1000 Genomes Project SNP | ImmunoChip SNP | Position on Chr7 (hg38) | Pairwise LD ( $r^2$ ) with rs73366469 in the 1000 Genomes Project subjects |                  |                 |
|--------------------------|----------------|-------------------------|----------------------------------------------------------------------------|------------------|-----------------|
|                          |                |                         | Asian (n=286)                                                              | European (n=379) | African (n=246) |
| rs146236144              | No             | 74580363                | 0.11                                                                       | 0.00             | 0.00            |
| rs17145600               | No             | 74580404                | 0.11                                                                       | 0.00             | 0.04            |
| rs2267813                | No             | 74582204                | 0.15                                                                       | 0.05             | 0.03            |
| rs80346167               | No             | 74586373                | 0.25                                                                       | 0.27             | 0.06            |
| rs11981999               | No             | 74587754                | 0.13                                                                       | 0.18             | 0.10            |
| rs2005769                | No             | 74590626                | 0.13                                                                       | 0.05             | 0.01            |
| rs150108204              | No             | 74594341                | 0.21                                                                       | 0.13             | 0.05            |
| rs2019004                | No             | 74595414                | 0.21                                                                       | 0.21             | 0.07            |
| rs116657731              | No             | 74597409                | 0.27                                                                       | 0.29             | 0.05            |
| rs112806573              | No             | 74598547                | 0.21                                                                       | 0.34             | 0.07            |
| rs4717901                | No             | 74602653                | 0.31                                                                       | 0.06             | 0.05            |
| <b>rs12667901</b>        | No             | 74607994                | <b>0.73</b>                                                                | <b>0.40</b>      | <b>0.31</b>     |
| <b>rs73366456</b>        | No             | 74608425                | <b>0.74</b>                                                                | <b>0.40</b>      | <b>0.39</b>     |
| rs113066392              | No             | 74611832                | 0.72                                                                       | 0.63             | 0.58            |
| rs112502846              | No             | 74611938                | 0.73                                                                       | 0.71             | 0.79            |
| rs7800325                | No             | 74618332                | 0.97                                                                       | 1.00             | 0.88            |
| rs73366469               | Yes            | 74619286                | --                                                                         | --               | --              |
| rs114860935              | No             | 74620209                | 0.20                                                                       | 0.21             | 0.14            |
| rs72038845               | No             | 74622249                | 0.22                                                                       | 0.72             | 0.42            |
| rs138731063              | No             | 74622806                | 0.20                                                                       | 0.21             | 0.14            |
| rs111273641              | No             | 74624371                | 0.20                                                                       | 0.21             | 0.11            |
| rs112504285              | No             | 74625217                | 0.20                                                                       | 0.21             | 0.12            |
| rs111527316              | No             | 74631507                | 0.19                                                                       | 0.21             | 0.10            |
| rs143176121              | No             | 74694107                | 0.12                                                                       | 0.00             | 0.00            |
| <b>rs117026326</b>       | No             | 74711703                | <b>0.53</b>                                                                | <b>0.17</b>      | <b>0.00</b>     |

We hypothesized that Chinese, European Americans and African Americans might share the same causal variant tagged by rs73366469 which should be an untyped functional SNP in strong, modest and weak LD with rs73366469 in Chinese, European Americans and African Americans, respectively. By searching the 1000 Genomes Project phase 1 data set, we found 24 SNPs in LD with rs73366469 in Asians at the level of  $r^2 \geq 0.1$  (as shown in the table). None of the 24 SNPs were on the ImmunoChip. Of these SNPs, rs12667901, rs73366456 and rs117026326 (highlighted in bold and red) were in strong LD with rs73366469 in Asians (defined as  $r^2 > 0.5$ ) but not in Europeans and Africans. We hypothesized these three SNPs as candidate causal variants. To confirm this, rs12667901 and rs117026326 were genotyped using TaqMan assays and assessed for association with SLE. Because rs73366456 was in strong LD with rs12667901 in all three ancestral groups, it was not genotyped.

**Supplementary Table 3. Association of p.Arg90His with SLE in Asians**

| Data set    | Chinese-1 |     | All subjects            |        |                         |                 |           |         |         |            |            |             |            |                  |                      |      |
|-------------|-----------|-----|-------------------------|--------|-------------------------|-----------------|-----------|---------|---------|------------|------------|-------------|------------|------------------|----------------------|------|
|             |           |     | MAF %                   |        | P after conditioning on |                 |           |         |         |            |            |             |            | P <sub>HWE</sub> |                      |      |
|             |           |     | Position on Chr7 (hg38) | Allele | SLE (n=436)             | Control (n=586) | P         | OR      | 95%CI   | rs12667901 | rs73366469 | rs117026326 | p.Arg90His | p.Ser99Gly       | log <sub>10</sub> BF | PP   |
| rs12667901  | 74607994  | T/G | 28.2                    | 12.4   | 1.3E-15                 | 2.90            | 2.23-3.76 | --      | 2.0E-03 | 0.50       | 0.63       | 1.4E-06     | 10.9       | 0.00             | 0.72                 | 0.01 |
| rs73366469  | 74619286  | C/T | 29.7                    | 13.9   | 1.7E-14                 | 2.66            | 2.07-3.42 | 0.86    | --      | 0.54       | 0.57       | 1.7E-06     | 10.0       | 0.00             | 0.91                 | 0.02 |
| rs117026326 | 74711703  | T/C | 28.1                    | 11.4   | 1.8E-17                 | 3.18            | 2.44-4.16 | 1.9E-03 | 7.8E-05 | --         | 0.27       | 1.1E-07     | 12.6       | 0.00             | 0.55                 | 0.01 |
| p.Arg90His  | 74779296  | A/G | 38.1                    | 15.6   | 2.6E-23                 | 3.35            | 2.64-4.26 | 1.7E-10 | 6.0E-12 | 2.0E-08    | --         | 2.5E-13     | 18.7       | 1.00             | 3.1E-03              | 0.64 |
| p.Ser99Gly  | 74779322  | G/A | 43.2                    | 26.8   | 1.6E-13                 | 2.22            | 1.80-2.74 | 1.1E-03 | 5.2E-05 | 0.022      | 0.70       | --          | 9.6        | 0.00             | 0.63                 | 0.83 |

We measured the ΔGT/GTGT ratio for subjects from different ancestry groups and found the normal ratio of 4:2 in >98% Asian subjects ( Fig. 3c). Because the impact of mixture of 5:1, 3:3 and 2:4 ratios on association analyses of p.Arg90His in the Asian data sets was negligible (please see the Korean data set as shown below), subjects in the Korean-RA, Chinese-2 and Chinese-SS data sets and some subjects in the Chinese-1 data set were not assessed for the ΔGT/GTGT ratio. In the Chinese-1 data set, 313 cases and 102 controls were measured for the ΔGT/GTGT ratio, of which those with the ratio of 5:1 (2 cases) or 3:3 (3 cases and 3 controls) were excluded for association analyses. Bayes factor (shown as log<sub>10</sub>BF) was calculated based on the additive model, and posterior probability (shown as PP) was computed for each SNP.

| Data set    | Chinese-2 |     | All subjects            |        |                         |                  |           |         |         |            |            |             |            |                  |                      |      |
|-------------|-----------|-----|-------------------------|--------|-------------------------|------------------|-----------|---------|---------|------------|------------|-------------|------------|------------------|----------------------|------|
|             |           |     | MAF %                   |        | P after conditioning on |                  |           |         |         |            |            |             |            | P <sub>HWE</sub> |                      |      |
|             |           |     | Position on Chr7 (hg38) | Allele | SLE (n=746)             | Control (n=1034) | P         | OR      | 95%CI   | rs12667901 | rs73366469 | rs117026326 | p.Arg90His | p.Ser99Gly       | log <sub>10</sub> BF | PP   |
| rs12667901  | 74607994  | T/G | 27.6                    | 13.0   | 3.9E-21                 | 2.52             | 2.08-3.05 | --      | 0.11    | 0.29       | 0.12       | 1.1E-08     | 16.9       | 0.00             | 1.00                 | 0.10 |
| rs73366469  | 74619286  | C/T | 30.0                    | 15.2   | 6.5E-22                 | 2.48             | 2.06-2.99 | 4.0E-03 | --      | 0.33       | 0.046      | 4.3E-11     | 17.7       | 0.00             | 0.49                 | 0.18 |
| rs117026326 | 74711703  | T/C | 27.1                    | 11.9   | 2.3E-24                 | 2.82             | 2.31-3.44 | 6.0E-05 | 2.9E-05 | --         | 0.093      | 9.0E-11     | 19.7       | 0.00             | 0.17                 | 0.37 |
| p.Arg90His  | 74779296  | A/G | 41.6                    | 16.7   | 1.5E-41                 | 3.27             | 2.75-3.88 | 7.7E-27 | 1.9E-26 | 2.9E-23    | --         | 1.5E-25     | 39.2       | 1.00             | 3.9E-04              | 1.00 |
| p.Ser99Gly  | 74779322  | G/A | 46.5                    | 28.2   | 1.6E-22                 | 2.13             | 1.83-2.48 | 9.4E-10 | 2.4E-11 | 3.7E-08    | 0.21       | --          | 18.9       | 0.00             | 0.42                 | 0.40 |

Subjects in the Chinese-2 dataset were not measured for the ΔGT/GTGT ratio. Association analyses were carried out in all subjects.

| Chinese-1&2 combined |  | All subjects      |      |  |  |                         |
|----------------------|--|-------------------|------|--|--|-------------------------|
| SNP                  |  | P <sub>meta</sub> | OR   |  |  |                         |
| rs12667901           |  | 5.5E-35           | 2.65 |  |  | log <sub>10</sub> BF PP |
| rs73366469           |  | 9.2E-35           | 2.55 |  |  | 32.9 0.00               |
| rs117026326          |  | 4.4E-40           | 2.94 |  |  | 32.0 0.00               |
| p.Arg90His           |  | 4.2E-63           | 3.30 |  |  | 37.2 0.00               |
| p.Ser99Gly           |  | 2.1E-34           | 2.16 |  |  | 63.7 1.00               |
|                      |  |                   |      |  |  | 30.6 0.00               |

| Data set    | Korean   | Subjects with the ΔGT/GTGT ratio of 4:2 |        |                         |                 |      |           |       |    |         |             |            |                  | All subjects         |       |      |                         |             |                 |      |           |         |             |            |
|-------------|----------|-----------------------------------------|--------|-------------------------|-----------------|------|-----------|-------|----|---------|-------------|------------|------------------|----------------------|-------|------|-------------------------|-------------|-----------------|------|-----------|---------|-------------|------------|
|             |          | MAF %                                   |        | P after conditioning on |                 |      |           |       |    |         |             |            | P <sub>HWE</sub> |                      | MAF % |      | P after conditioning on |             |                 |      |           |         |             |            |
|             |          | Position on Chr7 (hg38)                 | Allele | SLE (n=611)             | Control (n=685) | P    | OR        | 95%CI | -- | --      | rs117026326 | p.Arg90His | p.Ser99Gly       | log <sub>10</sub> BF | PP    | SLE  | Control                 | SLE (n=614) | Control (n=692) | P    | OR        | 95%CI   | rs117026326 | p.Arg90His |
| rs117026326 | 74711703 | T/C                                     | 30.0   | 11.4                    | 3.3E-27         | 3.25 | 2.63-4.03 | --    | -- | --      | 0.18        | 1.3E-10    | 23.1             | 0.0                  | 1.00  | 0.06 | 29.9                    | 11.4        | 3.0E-27         | 3.24 | 2.62-4.01 | --      | 0.17        | 1.2E-10    |
| p.Arg90His  | 74779296 | A/G                                     | 46.6   | 18.1                    | 2.6E-43         | 3.82 | 3.16-4.62 | --    | -- | 2.2E-22 | --          | 2.3E-25    | 41.7             | 1.0                  | 0.52  | 0.37 | 46.6                    | 18.1        | 2.2E-43         | 3.80 | 3.14-4.59 | 1.9E-22 | --          | 2.0E-25    |
| p.Ser99Gly  | 74779322 | G/A                                     | 52.4   | 30.5                    | 3.2E-26         | 2.47 | 2.09-2.92 | --    | -- | 3.5E-08 | 0.052       | --         | 22.7             | 0.0                  | 0.57  | 0.59 | 52.4                    | 30.6        | 2.8E-26         | 2.46 | 2.08-2.90 | 3.0E-08 | 0.043       | --         |

All Korean subjects were measured for the ΔGT/GTGT ratio.

Association analyses were carried out either in subjects with the normal ΔGT/GTGT ratio of 4:2 (carrying 2 copies each of *NCF1*, *NCF1B* and *NCF1C*) or in all subjects.

**Supplementary Table 4. Association of p.Arg90His with SLE in European Americans**

| Data set EurAm-1 |        | All subjects |                 |                           |      |           |            |            |             |            |            | Subjects with the ΔGT/GTGT ratio of 4:2 |                 |         |      |           |            |            |             |            |            | $P_{HWE}$            |      |      |         |
|------------------|--------|--------------|-----------------|---------------------------|------|-----------|------------|------------|-------------|------------|------------|-----------------------------------------|-----------------|---------|------|-----------|------------|------------|-------------|------------|------------|----------------------|------|------|---------|
|                  |        | MAF %        |                 | $P$ after conditioning on |      |           |            |            |             | MAF %      |            | $P$ after conditioning on               |                 |         |      |           |            |            |             |            |            |                      |      |      |         |
| SNP              | Allele | SLE (n=716)  | Control (n=578) | $P$                       | OR   | 95%CI     | rs12667901 | rs73366469 | rs117026326 | p.Arg90His | p.Ser99Gly | SLE (n=612)                             | Control (n=485) | $P$     | OR   | 95%CI     | rs12667901 | rs73366469 | rs117026326 | p.Arg90His | p.Ser99Gly | log <sub>10</sub> BF | PP   | SLE  | Control |
| rs12667901       | T/G    | 5.4          | 3.6             | 0.028                     | 1.56 | 1.05-2.32 | --         | 0.37       | 0.57        | 0.34       | 0.12       | 4.9                                     | 3.4             | 0.057   | 1.55 | 0.99-2.44 | --         | 0.34       | 0.78        | 0.79       | 0.021      | 0.2                  | 0.04 | 0.39 | 1.00    |
| rs73366469       | C/T    | 11.2         | 8.3             | 0.010                     | 1.43 | 1.09-1.87 | 0.21       | --         | 0.13        | 0.22       | 0.10       | 10.8                                    | 8.5             | 0.036   | 1.37 | 1.02-1.84 | 0.36       | --         | 0.29        | 0.64       | 0.12       | 0.4                  | 0.05 | 1.00 | 0.37    |
| rs117026326      | T/C    | 2.4          | 0.87            | 7.2E-03                   | 2.69 | 1.31-5.55 | 0.045      | 0.041      | --          | 0.39       | 0.036      | 2.4                                     | 0.72            | 6.4E-03 | 3.25 | 1.39-7.56 | 0.022      | 0.018      | --          | 0.59       | 0.019      | 0.4                  | 0.05 | 1.00 | 1.00    |
| p.Arg90His       | A/G    | 8.2          | 4.1             | 2.1E-05                   | 2.20 | 1.53-3.17 | 2.3E-04    | 3.6E-04    | 8.0E-04     | --         | 3.4E-04    | 5.5                                     | 2.1             | 9.5E-05 | 2.83 | 1.68-4.77 | 8.0E-04    | 9.5E-04    | 2.9E-03     | --         | 1.9E-03    | 1.4                  | 0.61 | 1.00 | 1.00    |
| p.Ser99Gly       | G/A    | 17.7         | 12.5            | 1.2E-03                   | 1.46 | 1.16-1.84 | 6.6E-03    | 0.014      | 0.010       | 0.027      | --         | 17.8                                    | 13.0            | 3.9E-03 | 1.44 | 1.12-1.84 | 1.9E-03    | 0.016      | 0.025       | 0.12       | --         | 1.1                  | 0.25 | 0.41 | 0.84    |

All subjects in the EurAm-1 data set were measured for the ΔGT/GTGT ratio. Association analyses were carried out either in all subjects or in those with the normal ΔGT/GTGT ratio of 4:2.

| Data set EurAm-2 |        | All subjects |                 |                           |      |           |            |            |             |            |            | Subjects with the ΔGT/GTGT ratio of 4:2 |                 |         |      |           |            |            |             |            |            | $P_{HWE}$            |      |      |         |
|------------------|--------|--------------|-----------------|---------------------------|------|-----------|------------|------------|-------------|------------|------------|-----------------------------------------|-----------------|---------|------|-----------|------------|------------|-------------|------------|------------|----------------------|------|------|---------|
|                  |        | MAF %        |                 | $P$ after conditioning on |      |           |            |            |             | MAF %      |            | $P$ after conditioning on               |                 |         |      |           |            |            |             |            |            |                      |      |      |         |
| SNP              | Allele | SLE (n=875)  | Control (n=540) | $P$                       | OR   | 95%CI     | rs12667901 | rs73366469 | rs117026326 | p.Arg90His | p.Ser99Gly | SLE (n=736)                             | Control (n=446) | $P$     | OR   | 95%CI     | rs12667901 | rs73366469 | rs117026326 | p.Arg90His | p.Ser99Gly | log <sub>10</sub> BF | PP   | SLE  | Control |
| rs12667901       | T/G    | 5.9          | 4.2             | 0.040                     | 1.46 | 1.02-2.11 | --         | 0.46       | 0.62        | 0.48       | 0.55       | 5.4                                     | 3.7             | 0.035   | 1.59 | 1.03-2.45 | --         | 0.50       | 0.66        | 0.50       | 0.52       | 0.3                  | 0.03 | 0.26 | 0.46    |
| rs73366469       | C/T    | 12.0         | 9.0             | 0.019                     | 1.37 | 1.05-1.79 | 0.25       | --         | 0.20        | 0.22       | 0.25       | 11.9                                    | 8.5             | 0.012   | 1.46 | 1.09-1.97 | 0.15       | --         | 0.16        | 0.25       | 0.14       | 0.7                  | 0.06 | 1.00 | 1.00    |
| rs117026326      | T/C    | 2.4          | 0.74            | 5.7E-03                   | 3.00 | 1.38-6.54 | 0.023      | 0.020      | --          | 0.16       | 0.039      | 2.4                                     | 0.67            | 6.1E-03 | 3.51 | 1.43-8.59 | 0.026      | 0.023      | --          | 0.29       | 0.032      | 0.4                  | 0.03 | 0.36 | 1.00    |
| p.Arg90His       | A/G    | 8.3          | 4.2             | 3.3E-04                   | 1.92 | 1.35-2.74 | 3.7E-03    | 3.3E-03    | 0.010       | --         | 0.016      | 6.0                                     | 2.4             | 5.0E-04 | 2.42 | 1.47-3.98 | 4.2E-03    | 5.1E-03    | 0.017       | --         | 0.023      | 1.3                  | 0.23 | 0.04 | 1.00    |
| p.Ser99Gly       | G/A    | 18.2         | 13.0            | 3.8E-04                   | 1.50 | 1.20-1.87 | 6.8E-03    | 6.0E-03    | 4.8E-03     | 0.026      | --         | 18.6                                    | 13.1            | 5.5E-04 | 1.53 | 1.20-1.95 | 0.011      | 6.9E-03    | 6.6E-03     | 0.057      | --         | 1.7                  | 0.65 | 0.18 | 0.21    |

All subjects in the EurAm-2 data set were measured for the ΔGT/GTGT ratio. Association analyses were carried out either in all subjects or in those with the normal ΔGT/GTGT ratio of 4:2.

| EurAm-1&2 combined |  | All subjects |      | Subjects with the ΔGT/GTGT ratio of 4:2 |      |                      |      |
|--------------------|--|--------------|------|-----------------------------------------|------|----------------------|------|
| SNP                |  | $P_{meta}$   | OR   | $P_{meta}$                              | OR   | log <sub>10</sub> BF | PP   |
| rs12667901         |  | 2.7E-03      | 1.51 | 4.5E-03                                 | 1.57 | 0.9                  | 0.00 |
| rs73366469         |  | 5.0E-04      | 1.40 | 1.1E-03                                 | 1.42 | 1.6                  | 0.00 |
| rs117026326        |  | 1.2E-04      | 2.83 | 1.1E-04                                 | 3.37 | 1.4                  | 0.00 |
| p.Arg90His         |  | 3.0E-08      | 2.05 | 1.9E-07                                 | 2.61 | 4.1                  | 0.83 |
| p.Ser99Gly         |  | 1.5E-06      | 1.48 | 7.3E-06                                 | 1.49 | 3.4                  | 0.17 |

**Supplementary Table 5. Association of p.Arg90His with SLE in African Americans**

| <b>Data set AfrAm</b>    |                         |        | <b>All subjects</b> |                 |          |      |           | <b>Subjects with the <math>\Delta</math>GT/GTGT ratio of 4:2</b> |                 |          |      |           |                |      |                         |         |
|--------------------------|-------------------------|--------|---------------------|-----------------|----------|------|-----------|------------------------------------------------------------------|-----------------|----------|------|-----------|----------------|------|-------------------------|---------|
| SNP                      | Position on Chr7 (hg38) | Allele | MAF %               |                 | <i>P</i> | OR   | 95%CI     | MAF %                                                            |                 | <i>P</i> | OR   | 95%CI     | $\log_{10}$ BF | PP   | <i>P</i> <sub>HWE</sub> |         |
|                          |                         |        | SLE (n=532)         | Control (n=367) |          |      |           | SLE (n=474)                                                      | Control (n=315) |          |      |           |                |      | SLE                     | Control |
| rs73366469               | 74619286                | C/T    | 17.7                | 19.6            | 0.32     | 0.88 | 0.69-1.13 | 18.5                                                             | 19.5            | 0.66     | 0.94 | 0.73-1.23 | -0.2           | 0.00 | 0.44                    | 0.86    |
| rs117026326 <sup>a</sup> | 74711703                | T/C    | 0.39                | 0.0             | 1.00     | --   | --        | 0.43                                                             | 0.0             | 1.00     | --   | --        | --             | --   | 1.00                    | 1.00    |
| p.Arg90His               | 74779296                | A/G    | 16.8                | 10.1            | 7.0E-05  | 1.80 | 1.35-2.40 | 15.7                                                             | 8.3             | 2.9E-05  | 2.02 | 1.45-2.81 | 2.4            | 1.00 | 0.30                    | 0.15    |
| p.Ser99Gly               | 74779322                | G/A    | 40.0                | 39.7            | 0.88     | 1.02 | 0.83-1.24 | 40.1                                                             | 39.4            | 0.78     | 1.03 | 0.83-1.27 | -0.3           | 0.00 | 0.45                    | 0.41    |
| Intronic-1 <sup>a</sup>  | 74780073                | C/G    | 0.39                | 0.0             | 1.00     | --   | --        | 0.43                                                             | 0.0             | 1.00     | --   | --        | --             | --   | 1.00                    | 1.00    |
| Intronic-2 <sup>a</sup>  | 74781840                | A/C    | 0.39                | 0.0             | 1.00     | --   | --        | 0.43                                                             | 0.0             | 1.00     | --   | --        | --             | --   | 1.00                    | 1.00    |

All subjects in the AfrAm data set were measured for the  $\Delta$ GT/GTGT ratio.

Association analyses were carried out either in all subjects or in those with the normal  $\Delta$ GT/GTGT ratio of 4:2.

<sup>a</sup>rs117026326, intronic-1 and intronic-2 were genotyped in a subset of African-American subjects (382 cases and 227 controls).



**Supplementary Table 7. Association of p.Arg90His with primary Sjögren's syndrome in European Americans and Chinese**

| Data set    |                         | Subjects with the $\Delta$ GT/GTGT ratio of 4:2 |            |                 |         |      |           |             |                         |            |                      |      |      |         |            | All subjects     |         |      |           |             |            |            |  |  |  |                         |  |  |
|-------------|-------------------------|-------------------------------------------------|------------|-----------------|---------|------|-----------|-------------|-------------------------|------------|----------------------|------|------|---------|------------|------------------|---------|------|-----------|-------------|------------|------------|--|--|--|-------------------------|--|--|
| EurAm-SS    |                         | MAF %                                           |            |                 |         |      |           |             | P after conditioning on |            |                      |      |      |         |            | P <sub>HWE</sub> |         |      | MAF %     |             |            |            |  |  |  | P after conditioning on |  |  |
| SNP         | Position on Chr7 (hg38) | Allele                                          | SS (n=302) | Control (n=931) | P       | OR   | 95%CI     | rs117026326 | p.Arg90His              | p.Ser99Gly | log <sub>10</sub> BF | PP   | SS   | Control | SS (n=373) | Control (n=1118) | P       | OR   | 95%CI     | rs117026326 | p.Arg90His | p.Ser99Gly |  |  |  |                         |  |  |
| rs117026326 | 74711703                | T/C                                             | 2.0        | 0.70            | 7.3E-03 | 3.12 | 1.36-7.17 | --          | 0.36                    | 0.017      | 0.2                  | 0.21 | 1.00 | 1.00    | 1.9        | 0.81             | 0.018   | 2.43 | 1.16-5.09 | --          | 0.28       | 0.042      |  |  |  |                         |  |  |
| p.Arg90His  | 74779296                | A/G                                             | 4.8        | 2.2             | 9.7E-04 | 2.35 | 1.42-3.91 | 0.036       | --                      | 4.0E-03    | 0.7                  | 0.66 | 0.51 | 1.00    | 7.0        | 4.1              | 2.8E-03 | 1.75 | 1.21-2.53 | 0.038       | --         | 0.016      |  |  |  |                         |  |  |
| p.Ser99Gly  | 74779322                | G/A                                             | 15.4       | 13.1            | 0.20    | 1.19 | 0.91-1.55 | 0.54        | 0.927                   | --         | 0.0                  | 0.13 | 0.51 | 0.56    | 15.0       | 12.8             | 0.19    | 1.18 | 0.92-1.50 | 0.50        | 0.50       | --         |  |  |  |                         |  |  |

All subjects in the EurAm-SS data set were measured for the  $\Delta$ GT/GTGT ratio. Association analyses were carried out either in all subjects or in those with the normal  $\Delta$ GT/GTGT ratio of 4:2.

| Data set    |                         | All subjects |            |                 |         |      |           |             |                         |            |                      |      |         |         |  |                  |  |  |
|-------------|-------------------------|--------------|------------|-----------------|---------|------|-----------|-------------|-------------------------|------------|----------------------|------|---------|---------|--|------------------|--|--|
| Chinese-SS  |                         | MAF %        |            |                 |         |      |           |             | P after conditioning on |            |                      |      |         |         |  | P <sub>HWE</sub> |  |  |
| SNP         | Position on Chr7 (hg38) | Allele       | SS (n=449) | Control (n=469) | P       | OR   | 95%CI     | rs117026326 | p.Arg90His              | p.Ser99Gly | log <sub>10</sub> BF | PP   | SS      | Control |  |                  |  |  |
| rs117026326 | 74711703                | T/C          | 26.2       | 14.7            | 4.6E-09 | 2.03 | 1.60-2.57 | --          | 0.29                    | 1.9E-03    | 5.6                  | 0.00 | 0.71    | 0.71    |  |                  |  |  |
| p.Arg90His  | 74779296                | A/G          | 37.8       | 18.3            | 7.2E-17 | 2.45 | 1.98-3.02 | 4.3E-10     | --                      | 7.3E-13    | 13.0                 | 1.00 | 1.2E-03 | 0.35    |  |                  |  |  |
| p.Ser99Gly  | 74779322                | G/A          | 41.5       | 29.1            | 9.7E-08 | 1.68 | 1.39-2.04 | 0.064       | 0.017                   | --         | 4.9                  | 0.00 | 0.02    | 0.74    |  |                  |  |  |

Subjects in the Chinese-SS data set were not measured for the  $\Delta$ GT/GTGT ratio. Association analyses were carried out in all subjects.



**Supplementary Table 8. Independent association of p.Arg90His with seropositive rheumatoid arthritis in Koreans**

| Data set   | Korean-RA |                         | MAF %  |            | <i>P</i> afte conditioning on |          |           |       |            | <i>P</i> <sub>HWE</sub> |                      |      |      |
|------------|-----------|-------------------------|--------|------------|-------------------------------|----------|-----------|-------|------------|-------------------------|----------------------|------|------|
|            | SNP       | Position on Chr7 (hg38) | Allele | RA (n=863) | Control (n=685)               | <i>P</i> | OR        | 95%CI | p.Arg90His | p.Ser99Gly              | log <sub>10</sub> BF | PP   | RA   |
| p.Arg90His | 74779296  | A/G                     | 26.6   | 18.1       | 2.5E-08                       | 1.65     | 1.38-1.97 | --    | 1.1E-05    | 5.5                     | 1.00                 | 0.30 | 0.45 |
| p.Ser99Gly | 74779322  | G/A                     | 35.2   | 30.5       | 2.0E-03                       | 1.27     | 1.09-1.49 | 0.94  | --         | 1.4                     | 0.00                 | 0.55 | 0.93 |

Korean patients with rheumatoid arthritis were not measured for the ΔGT/GTGT ratio.

Korean controls were measured for the ΔGT/GTGT ratio, and only those with the 4:2 ratio were included in associaton analyses.

**Supplementary Table 9. Association of copy number variation of *NCF1* with SLE and SS**

| Disease | Ancestry | Subject |         | 5:1 ratio                   |         |         |      |           | 3:3 and 2:4 ratio           |            |         |      |           | 4:2 ratio (reference)       |            |
|---------|----------|---------|---------|-----------------------------|---------|---------|------|-----------|-----------------------------|------------|---------|------|-----------|-----------------------------|------------|
|         |          | Case    | Control | N <sup>a</sup> (frequency%) |         | P       | OR   | 95% CI    | N <sup>a</sup> (frequency%) |            | P       | OR   | 95% CI    | N <sup>a</sup> (frequency%) |            |
|         |          |         |         | Case                        | Control |         |      |           | Case                        | Control    |         |      |           | Case                        | Control    |
| SLE     | Korean   | 829     | 782     | 3 (0.4)                     | 0 (0.0) | 0.032   | -    | -         | 0 (0.0)                     | 7 (0.9)    | 3.7E-05 | --   | --        | 826 (99.6)                  | 775 (99.1) |
| SLE     | Chinese  | 511     | 573     | 3 (0.6)                     | 0 (0.0) | 0.011   | -    | -         | 3 (0.6)                     | 12 (2.1)   | 2.8E-03 | 0.28 | 0.11-0.68 | 505 (98.8)                  | 561 (97.9) |
| SLE     | EurAm    | 1593    | 1118    | 17 (1.1)                    | 3 (0.3) | 5.9E-04 | 3.91 | 1.64-9.33 | 227 (14.2)                  | 184 (16.5) | 0.038   | 0.85 | 0.73-0.99 | 1349 (84.7)                 | 931 (83.3) |
| SLE     | AfrAm    | 716     | 406     | 4 (0.6)                     | 1 (0.2) | 0.509   | 2.19 | 0.46-10.4 | 73 (10.2)                   | 55 (13.5)  | 0.018   | 0.73 | 0.56-0.95 | 639 (89.2)                  | 350 (86.2) |
| SS      | EurAm    | 382     | 1118    | 3 (0.8)                     | 3 (0.3) | 0.085   | 3.02 | 0.97-9.41 | 71 (18.6)                   | 184 (16.5) | 0.163   | 1.17 | 0.94-1.45 | 308 (80.6)                  | 931 (83.3) |

<sup>a</sup>number

**Supplementary Table 10. *NCF1*-specific PCR and sequencing primers**

| PCR product  | PCR primer                                                                           | Sequencing primer                                                                                                                                                                                                                                                                                                                                                                                                                           |
|--------------|--------------------------------------------------------------------------------------|---------------------------------------------------------------------------------------------------------------------------------------------------------------------------------------------------------------------------------------------------------------------------------------------------------------------------------------------------------------------------------------------------------------------------------------------|
| P1 (3375bp)  | P1-L (forward): 5'-GCAAAGCCCTTTCTGTACCC<br>P1-R (reverse): 5'-TCACCAGGAACATGTACACCTG | P1-1: 5'-GCAAAGCCCTTTCTGTACCC<br>P1-2: 5'-AGGCCAGGGAGGAACTACAT<br>P1-3: 5'-CGTGAGCTACCGTGCCTAGT<br>P1-4: 5'-ATCCACTGCCCTGGATACAC<br>P1-5: 5'-CGGATTCTGGATCGGTCTTA<br>P1-6: 5'-TCACCAGGAACATGTACACCTG<br>P1-7: 5'-GTTTGTGCCCTTTCTGCAAT                                                                                                                                                                                                       |
| P2 (6466bp)  | P2-L (forward): 5'-GCTTTCCCCCAGGTGTACA<br>P2-R (reverse): 5'-CCCAGACTCCAAAGCAGTCA    | P2-1: 5'-AAAGCGACAAGAATGGTTCC<br>P2-2: 5'-TAACGAAAATGGCCTCCTTG<br>P2-3: 5'-CCTTGTGGTTCTCGTCCCTA<br>P2-4: 5'-AGCAAAGGATTTGCTGGTG<br>P2-5: 5'-CTGTCAGGGGGTCATTGG<br>P2-6: 5'-TGTCTGGGGTCTCCTGTACC<br>P2-7: 5'-CCTGAACACTCTGGGTCTCC<br>P2-8: 5'-TGGGAAGTTCTTCTGCAGGT<br>P2-9: 5'-TTTCTGACCAGCCCTTCATC<br>P2-10: 5'-AGGGCCCCTACTACTGACCT<br>P2-11: 5'-TTGTGGCTGTGGGTTCT<br>P2-12: 5'-CCCAGACTCCAAAGCAGTCA                                       |
| P3 (6298bp)  | P3-L (forward): 5'-AAGGCTCAGGCAGCCTTG<br>P3-R (reverse): 5'-CAGACCTCGGCTCTTGCAACTT   | P3-1: 5'-GTGTCCTCACCATCCCTGAT<br>P3-2: 5'-TTACAAGCATGCACCACCAT<br>P3-3: 5'-TCTACCTGGCACTGGGAAT<br>P3-4: 5'-ACCCAGATCCCTAAACACC<br>P3-5: 5'-AGGCGCAGAGAGGAGAAGAT<br>P3-6: 5'-TGGGGTCAAGTGATCCTTTC<br>P3-7: 5'-TCATGCCTGTAATCCCAACA<br>P3-8: 5'-CTCCAGCTTGGGAGTCAGAG<br>P3-9: 5'-TTTCTGGTTCTGGGGAACAC<br>P3-10: 5'-TCCTGTCTCAGCTTCCCAAG<br>P3-11: 5'-ATGGCCTAGACAGAGCGAAC<br>P3-12: 5'-AGAGAGCCCTGAAACCCTCT<br>P3-13: 5'-CCCAGCAGAACTCACAACCT |
| P2* (2208bp) | P2-L* (forward): 5'-GCTTTCCCCCAGGTGTAC<br>P2-R* (reverse): 5'-CCTTCCCTCTCCACCT       |                                                                                                                                                                                                                                                                                                                                                                                                                                             |

**Supplementary Table 11. TaqMan assays for SNP genotyping and the  $\Delta$ GT/GTGT ratio**

| Target      | Forward Primer Sequence                   | Reverse Primer Sequence     | Reporter 1 Sequence  | Reporter 2 Sequence |
|-------------|-------------------------------------------|-----------------------------|----------------------|---------------------|
| rs12667901  | TGGTGACGGATGCCTGTAATC                     | ACCTTCTGGTTTCAAGCGATTCTC    | CTGCCTCAGCCTCCCGA    | CTGCCTCAGACTCCCGA   |
| rs73366469  | CGTGTGCCTGAGCAATTGAG                      | ACAGCCTGGCCCTCTCT           | CTTCCTCCTGCAGGCC     | TCCTCCCGCAGGCC      |
| rs117026326 | GGTTAGTTTGCATTTTCTATAAAAGTCTTATGAATGAAATA | GCTGTGGATGAATTTCAAACAATCATT | CTCCCCGGCCCATG       | CTCCCCAGCCCATG      |
| p.Arg90His  | CAGCTCCCAAGTGGTTTGAC                      | GGTGGGCAGGCTCATGA           | CCTGGCGGTTCTC        | CCTGGTGGTTCTC       |
| p.Ser99Gly  | CGGGCCGCCGAGAA                            | TGGTGGGCAGGCTCATG           | AGTACTGCGGCACGCT     | AGTACTGCAGCACGCT    |
| Intronic-1  | AGCACTTATTGACGCTTGAAGGT                   | GCCTCCCGGGCTGATG            | CTGCCCTTCCTTGGGC     | TGCCCTTCGTTGGGC     |
| Intronic-2  | CCTCCCAAAGTGCTGAGATTATAGA                 | CAACAGGCCTCGTGCCTTA         | CCGGCTTTTTCTTCTTCTTA | CGGCTTTTTCTTATTCTTA |
| GTGT        | CCCCGACTCTGGCTTTCC                        | CCGACAGGTCCTGCCATT          | CCCAGGTGTACATGTT     |                     |
| $\Delta$ GT | CCCCGACTCTGGCTTTCC                        | CCGACAGGTCCTGCCATT          | CCCAGGTACATGTTCT     |                     |
